# Supplementary material for: Oxidative stress via UVC irradiation on the structural rearrangement of hen egg white lysozyme
Source: Royal Society of Chemistry journal article supplement (doi:10.1039/d4cp03653k), 2024-12-09
Supplement: d4cp03653k1.pdf [file d4cp03653k1.pdf]

*Supplementary Information*

**Oxidative stress via UVC irradiation on the structural rearrangement of Hen  
Egg White Lysozyme**

Debdip Brahma and Amar Nath Gupta<sup>1\*</sup>

<sup>1</sup> Biophysics and Soft Matter Laboratory, Department of Physics, Indian Institute of Technology Kharagpur,  
721302, India

\* Corresponding author, *Email address:* [ang@phy.iitkgp.ac.in](mailto:ang@phy.iitkgp.ac.in) (A.N. Gupta)

Table 1. Changes in the secondary structure of Lysozyme with heating/cooling

| Temperature (°C) | $\alpha$ -helix (%) | $\beta$ -sheet (%) | Unordered (%) | Turn (%) |
|------------------|---------------------|--------------------|---------------|----------|
| 20               | 34 ± 3              | 16 ± 3             | 30 ± 3        | 20 ± 2   |
| 30               | 36 ± 5              | 13 ± 2             | 32 ± 8        | 18 ± 5   |
| 40               | 36 ± 5              | 15 ± 3             | 31 ± 6        | 18 ± 4   |
| 50               | 36 ± 4              | 15 ± 2             | 30 ± 5        | 19 ± 4   |
| 60               | 37 ± 6              | 15 ± 3             | 28 ± 7        | 21 ± 4   |
| 70               | 28 ± 2              | 15 ± 3             | 37 ± 5        | 19 ± 1   |
| 80               | 15 ± 1              | 20 ± 3             | 48 ± 5        | 16 ± 2   |
| 90               | 12 ± 3              | 20 ± 3             | 53 ± 2        | 15 ± 2   |
| 80               | 11 ± 4              | 27 ± 6             | 51 ± 3        | 14 ± 4   |
| 70               | 15 ± 9              | 29 ± 7             | 44 ± 5        | 16 ± 4   |
| 60               | 11 ± 5              | 27 ± 1             | 44 ± 4        | 19 ± 1   |
| 50               | 10 ± 3              | 33 ± 2             | 36 ± 6        | 21 ± 1   |
| 40               | 11 ± 4              | 31 ± 6             | 37 ± 9        | 19 ± 1   |
| 30               | 11 ± 3              | 33 ± 4             | 33 ± 9        | 22 ± 4   |
| 20               | 11 ± 7              | 32 ± 3             | 38 ± 3        | 19 ± 1   |

Table 2. Changes in the secondary structure of UVC-exposed Lysozyme with heating/cooling

| Temperature (°C) | $\alpha$ -helix (%) | $\beta$ -sheet (%) | Unordered (%) | Turn (%) |
|------------------|---------------------|--------------------|---------------|----------|
| 20               | 7 ± 1               | 34 ± 4             | 37 ± 9        | 22 ± 5   |
| 30               | 9 ± 3               | 33 ± 1             | 37 ± 7        | 21 ± 5   |
| 40               | 9 ± 4               | 30 ± 8             | 39 ± 9        | 18 ± 3   |
| 50               | 7 ± 4               | 31 ± 5             | 41 ± 9        | 22 ± 8   |
| 60               | 10 ± 5              | 33 ± 9             | 37 ± 9        | 25 ± 4   |
| 70               | 10 ± 1              | 28 ± 5             | 38 ± 8        | 24 ± 7   |
| 80               | 8 ± 1               | 24 ± 5             | 45 ± 3        | 22 ± 7   |
| 90               | 4 ± 1               | 32 ± 1             | 52 ± 5        | 13 ± 2   |
| 80               | 8 ± 2               | 30 ± 7             | 38 ± 8        | 23 ± 9   |
| 70               | 10 ± 1              | 29 ± 4             | 38 ± 7        | 23 ± 6   |
| 60               | 9 ± 1               | 30 ± 4             | 39 ± 7        | 23 ± 6   |
| 50               | 9 ± 1               | 25 ± 4             | 38 ± 9        | 17 ± 1   |
| 40               | 9 ± 1               | 33 ± 9             | 45 ± 3        | 13 ± 6   |
| 30               | 6 ± 3               | 26 ± 7             | 48 ± 2        | 15 ± 4   |
| 20               | 9 ± 4               | 32 ± 9             | 36 ± 9        | 18 ± 5   |
